# Supplementary material for: Factors associated with COVID-19 vaccine acceptance and hesitancy among residents of Northern California jails
Source: bioRxiv or medRxiv preprint supplement (doi:10.1101/2021.11.22.21266559), 2021-11-24

# Figure S1

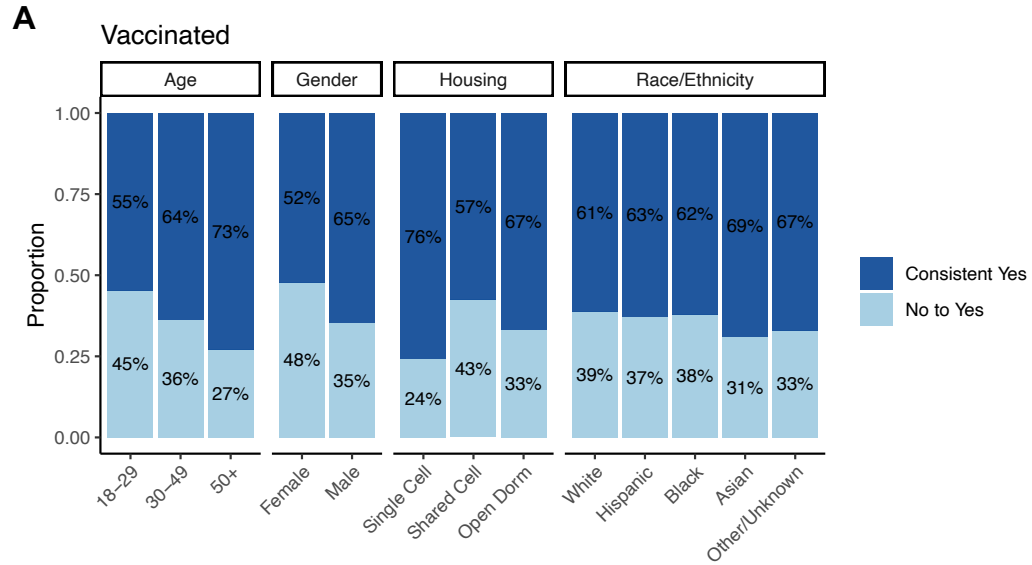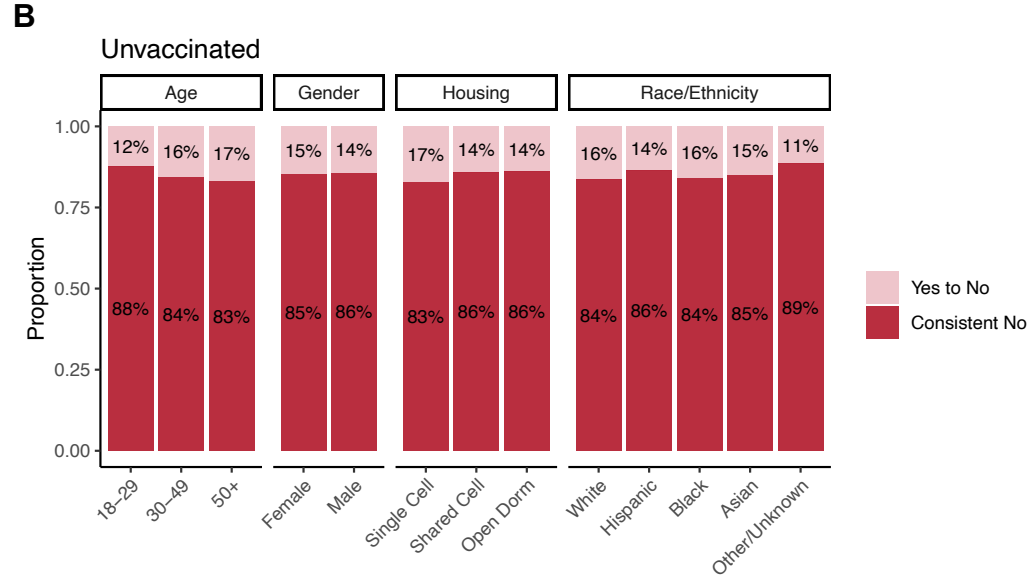

# Figure S2

**Of those who did NOT intend to get a vaccine, % who say each of the following factors would make them a lot / a little less likely to get a vaccine**

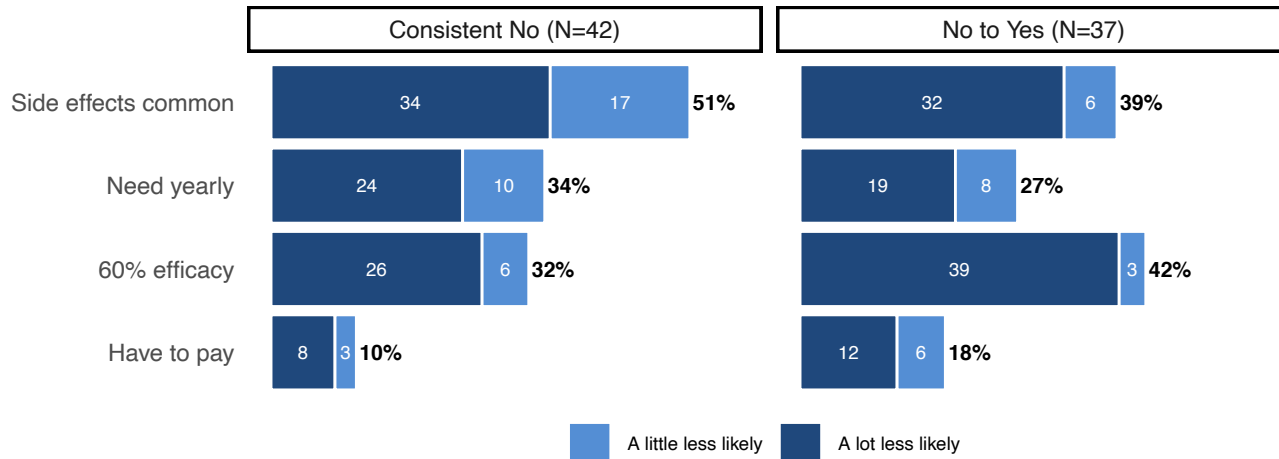

**Of those who intended to get a vaccine, % who say each of the following factors would make them a lot / a little less likely to get a vaccine**

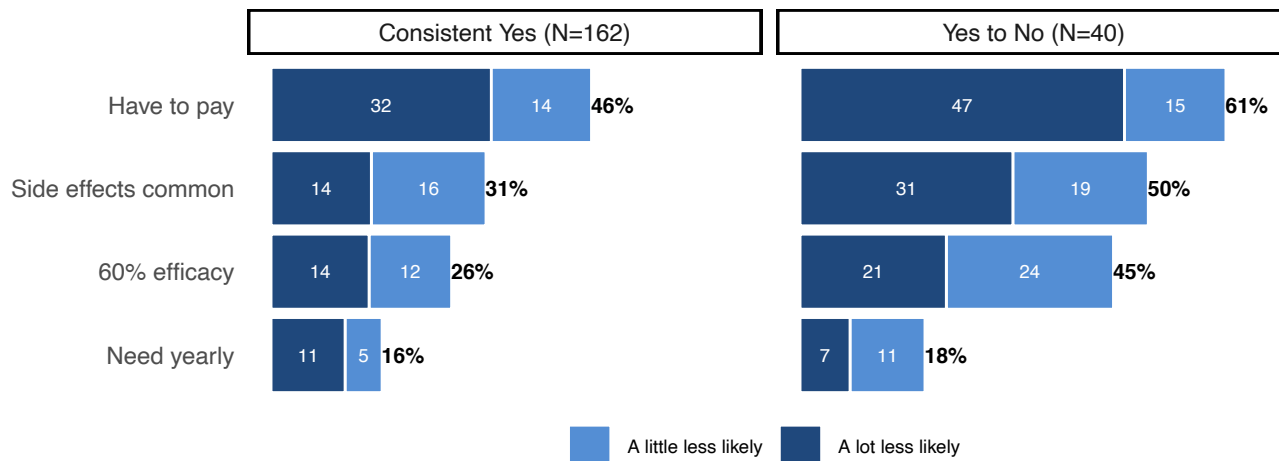

**Figure S3**

**A**

I trust my doctor's judgments about my medical care.

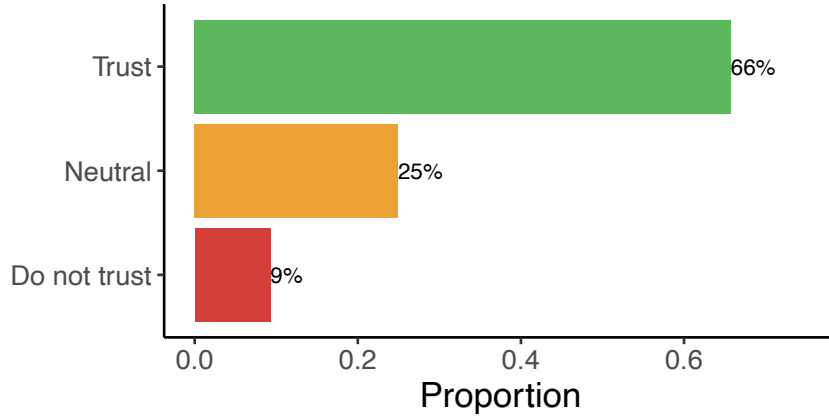

**B**

I trust the jail doctors' and nurses' judgments about my medical care.

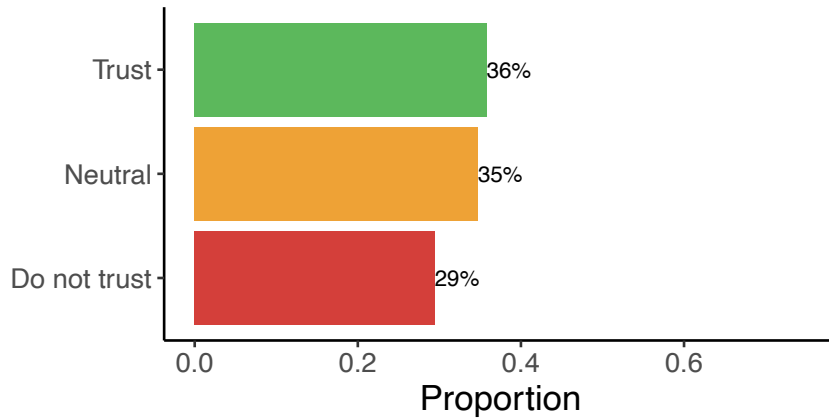

**C**

I trust my doctor's judgments about my medical care.

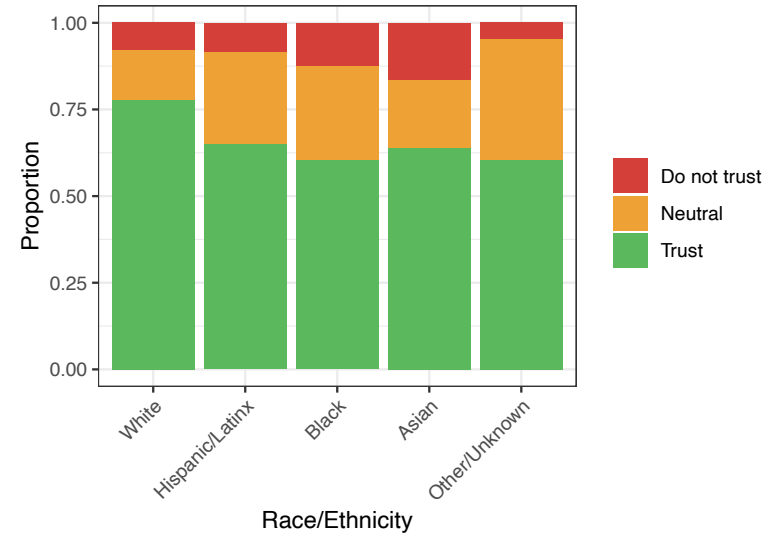

**D**

I trust the jail doctors' and nurses' judgments about my medical care.

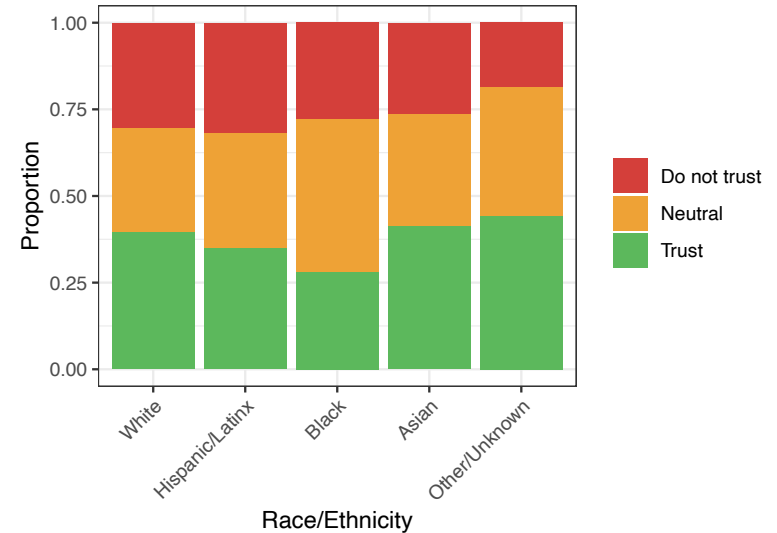

**Figure S4**

**Trust in Doctor Outside Jail**

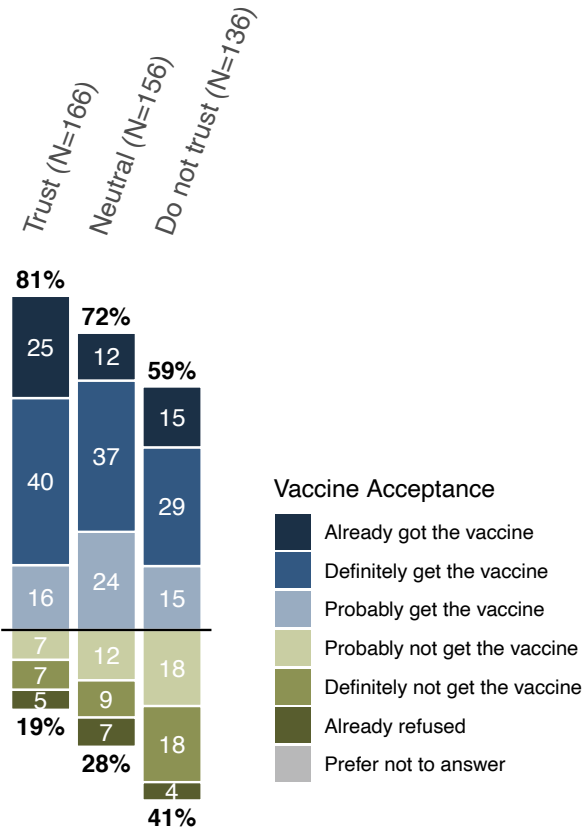

**Race/ethnicity**

**Adjusted Odds Ratio (95% CI)**

White  
Hispanic/Latinx  
Black  
Asian  
Other/Unknown

4.2 (1.2-15.3)  
1.6 (0.9-3.0)  
1.0 (0.3-2.7)  
9.8 (0.9-106.2)  
1.9 (0.4-8.5)

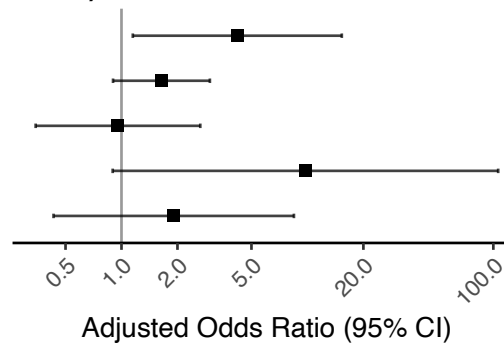

# Figure S5

## % who receive and trust information about COVID-19 from the following sources, by vaccine acceptance

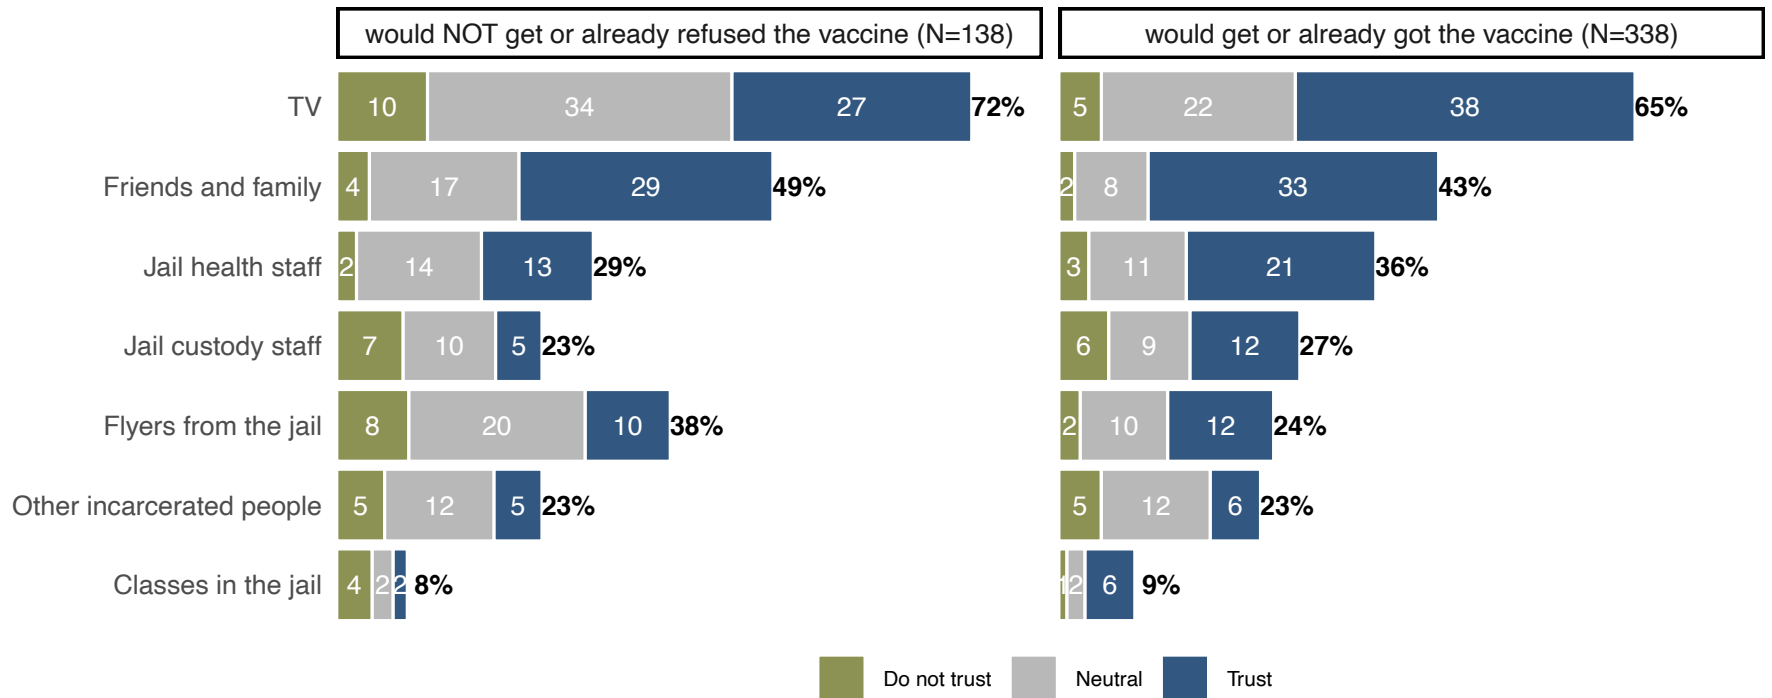

Supplement: Supplementary file [file media-1.pdf]
