# Supplementary material for: Factors associated with COVID-19 vaccine acceptance and hesitancy among residents of Northern California jails
Source: bioRxiv or medRxiv preprint supplement (doi:10.1101/2021.11.22.21266559), 2021-11-24
Supplement: Supplementary file [file media-2.pdf]

**The following questions will ask about your attitudes toward vaccines and medical care. Vaccination is NOT a part of this study. Like the rest of this questionnaire, your answers will be confidential and will not affect your housing, sentence, parole, medical care, or participation in this study.**

Have you been vaccinated for COVID 19?  Yes  
 No

When were you vaccinated?

( (the first dose of COVID-19 vaccine))

If a vaccine to prevent COVID-19 were available today, I would choose to:  Definitely get the vaccine  
 Probably get the vaccine  
 Probably not get the vaccine  
 Definitely not get the vaccine  
 Prefer not to answer

Consider another possible situation: a COVID-19 vaccine has been approved by the FDA, but supply is limited. If it were only available to high risk groups including healthcare workers and people in jails/prisons, I would choose to:  Definitely get the vaccine  
 Probably get the vaccine  
 Probably not get the vaccine  
 Definitely not get the vaccine  
 Prefer not to answer

If you probably or definitely would not get a vaccine to prevent COVID-19, please select the reasons you would not below:  Concern about side effects  
 Do not think I need it  
 It would cost too much  
 Want to know more about how well it works  
 Other  
 Prefer not to answer

Other: Please Specify \_\_\_\_\_

Is "concern about side effects" a major or minor reason you would not get the vaccine?  Major reason  
 Minor reason  
 Prefer not to answer

Is "I do not think I need it" a major or minor reason you would not get the vaccine?  Major reason  
 Minor reason  
 Prefer not to answer

Is "It would cost too much" a major or minor reason you would not get the vaccine?  Major reason  
 Minor reason  
 Prefer not to answer

Is "Want to know more about how well it works" a major or minor reason you would not get the vaccine?  Major reason  
 Minor reason  
 Prefer not to answer

Which of the following factors would make you less likely to get the vaccine?  I would have to pay out of pocket to get it  
 If many people experienced minor side effects  
 If the vaccine was effective about 60% of the time  
 If I needed to get the vaccine again every year  
 Prefer not to answer

"I would have to pay out of pocket to get a vaccine" would make me:  A LOT less likely to get a vaccine  
 A LITTLE less likely to get a vaccine  
 Would not make a difference in if I got a vaccine  
 Prefer not to answer

"If many people experienced minor side effects" would make me:  A LOT less likely to get a vaccine  
 A LITTLE less likely to get a vaccine  
 Would not make a difference in if I got a vaccine  
 Prefer not to answer

---

"If the vaccine was effective about 60% of the time" would make me:

- A LOT less likely to get a vaccine
- A LITTLE less likely to get a vaccine
- Would not make a difference in if I got a vaccine
- Prefer not to answer

---

"If I needed to get the vaccine again every year" would make me:

- A LOT less likely to get a vaccine
- A LITTLE less likely to get a vaccine
- Would not make a difference in if I got a vaccine
- Prefer not to answer

---

From where do you receive information about COVID-19?

- Correctional officers/custody staff
- Correctional health staff (i.e. doctors and nurses)
- Educational programming in the jail (i.e. classes)
- Friends and family
- Informational flyers from the jail
- Other incarcerated people
- TV news and other sources of news
- Other
- Prefer not to answer

---

I trust information about COVID-19 that I receive from correctional officers/custody staff

- Strongly disagree
- Disagree
- Neutral
- Agree
- Strongly agree
- Prefer not to answer

---

I trust information about COVID-19 that I receive from correctional health staff (i.e. doctors and nurses)

- Strongly disagree
- Disagree
- Neutral
- Agree
- Strongly agree
- Prefer not to answer

---

I trust information about COVID-19 that I receive from educational programming in the jail (i.e. classes)

- Strongly disagree
- Disagree
- Neutral
- Agree
- Strongly agree
- Prefer not to answer

---

I trust information about COVID-19 that I receive from friends and family

- Strongly disagree
- Disagree
- Neutral
- Agree
- Strongly agree
- Prefer not to answer

---

I trust information about COVID-19 that I receive from informational flyers from the jail

- Strongly disagree
- Disagree
- Neutral
- Agree
- Strongly agree
- Prefer not to answer

---

I trust information about COVID-19 that I receive from other incarcerated people

- Strongly disagree
- Disagree
- Neutral
- Agree
- Strongly agree
- Prefer not to answer

---

I trust information about COVID-19 that I receive from TV news and other sources of news

- Strongly disagree
- Disagree
- Neutral
- Agree
- Strongly agree
- Prefer not to answer

**As you read each of the following statements, please think about the medical care that you have received outside of jails/prisons. If you have not received any medical care recently, select the answer based on what you would expect if you had to seek medical care outside of jails/prisons today.**

I trust my doctor's judgments about my medical care.

- Strongly Disagree
- Disagree
- Neutral
- Agree
- Strongly Agree
- Prefer not to answer

---

I trust my doctor to put my medical needs above all other considerations when treating my medical problems.

- Strongly Disagree
- Disagree
- Neutral
- Agree
- Strongly Agree
- Prefer not to answer

---

I believe that my doctor takes my health concerns seriously.

- Strongly Disagree
- Disagree
- Neutral
- Agree
- Strongly Agree
- Prefer not to answer

---

While outside of jail/prison, I worry that I will be denied the treatment or services I need.

- Strongly Disagree
- Disagree
- Neutral
- Agree
- Strongly Agree
- Prefer not to answer

---

Generally speaking, would you say that most people can be trusted or that you can't be too careful in dealing with people?

- Can trust
- Cannot trust
- Depends
- Prefer not to answer

**As you read each of the following statements, please think about the medical care that you have received in jails/prisons. If you have not received any medical care recently, select the answer based on what you would expect if you had to seek medical care in a jail or prison today.**

I trust the jail doctors' and nurses' judgments about my medical care.

- Strongly Disagree
- Disagree
- Neutral
- Agree
- Strongly Agree
- Prefer not to answer

---

I trust the jail doctors and nurses to put my medical needs above all other considerations when treating my medical problems.

- Strongly Disagree
- Disagree
- Neutral
- Agree
- Strongly Agree
- Prefer not to answer

---

I believe that the jail doctors and nurses take my health concerns seriously.

- Strongly Disagree
- Disagree
- Neutral
- Agree
- Strongly Agree
- Prefer not to answer

---

While in jail/prison, I worry that I will be denied the treatment or services I need.

- Strongly Disagree
- Disagree
- Neutral
- Agree
- Strongly Agree
- Prefer not to answer
